# Supplementary material for: Multi-omics analysis reveals tissue-specific biosynthesis and accumulation of diterpene alkaloids in Aconitum japonicum
Source: Springer Nature journal article supplement (doi:10.1007/s11418-025-01881-y), 2025-03-20
Supplement: MOESM13 [file 11418_2025_1881_MOESM13_ESM.pdf]

**Supplementary Figure 1**

**A**

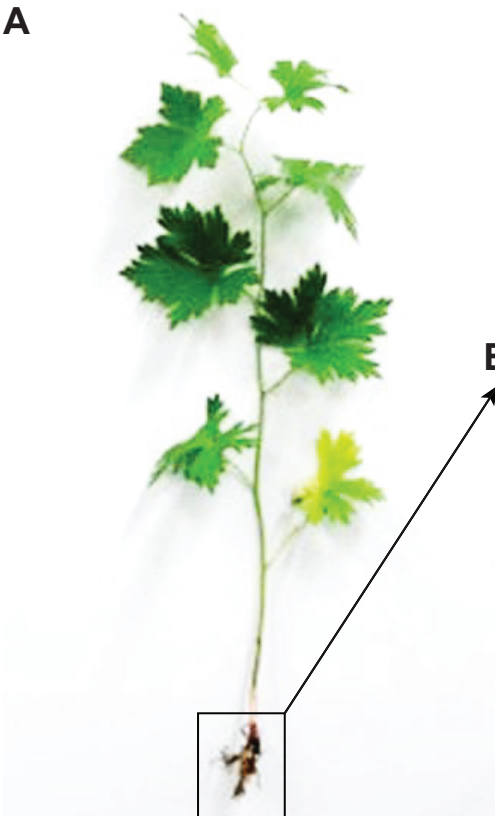

**B**

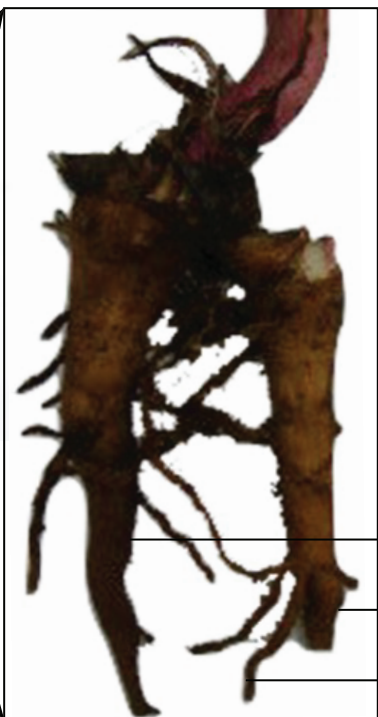

Mother Root (MR)

Daughter Root (DR)

Rootlet (RT)
